# Supplementary material for: Chitosan assisted synthesis of 3D graphene@Au nanosheet composites: catalytic reduction of 4-nitrophenol
Source: Royal Society of Chemistry journal article supplement (doi:10.1039/c5ra14134f), 2015-01-01
Supplement: c5ra14134f1.pdf [file c5ra14134f1.pdf]

## Supporting information

### **Chitosan Assisted Synthesis of 3D Graphene@Au Nanowalls Composites:**

#### **Catalytic Reduction of 4–nitrophenol**

Zhuo Ma,<sup>c</sup> Yunfeng Qiu,<sup>a,b\*</sup> Yanmin Huang,<sup>b</sup> Feng Gao,<sup>b</sup> and PingAn Hu<sup>b\*</sup>

<sup>a</sup> *State Key Laboratory of Urban Water Resource and Environment, Harbin Institute of Technology, Harbin 150090, China. Corresponding author: Fax: +86 451 86403583, E-mail: [qiuyf@hit.edu.cn](mailto:qiuyf@hit.edu.cn) (Y. Qiu).*

<sup>b</sup> *Key Lab of Microsystem and Microstructure, Ministry of Education, Harbin Institute of Technology, No. 2 YiKuang Street, Harbin 150080, PR China. Corresponding author: Fax: +86 451 86403583, E-mail address: [hupa@hit.edu.cn](mailto:hupa@hit.edu.cn) (P. Hu).*

<sup>c</sup> *School of Life Science and Technology, Harbin Institute of Technology, 92 West Dazhi Street, Harbin, Heilongjiang, 150001, P.R. China.*

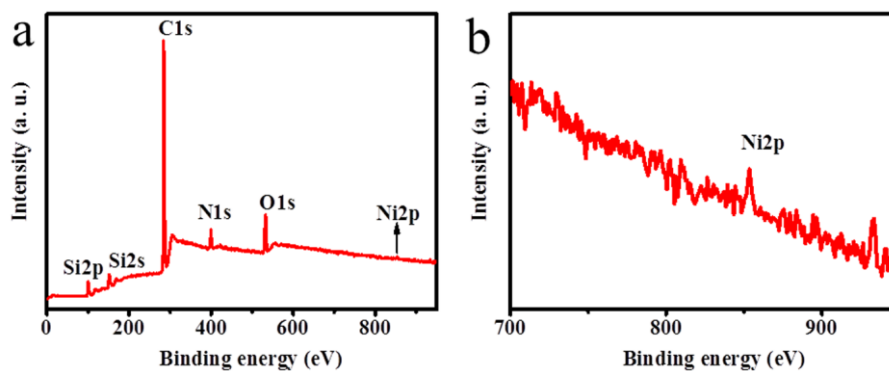

**Figure S1.** XPS spectrum of (a) 3DG and (b) magnification of Ni2p peak, implying negligible nickel residues (0.33 wt%) left on the surface of 3DG after thoroughly washing process. The peaks at ~100 eV (Si 2p) and ~ 150 eV (Si 2s) result from the underlying silicon substrate used to analyze samples.

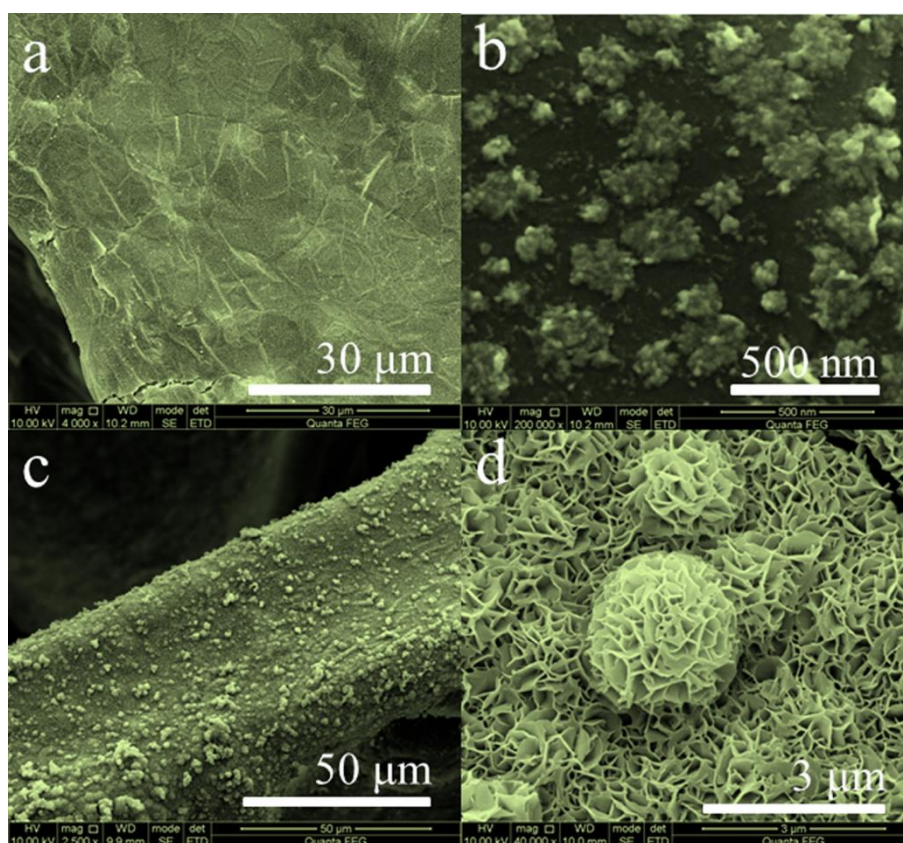

**Figure S2.** (a and c) Low-magnification and (b and d) high-magnification SEM images of 3DG@CS@Au synthesized in the presence of 0.05 mg/mL HAuCl<sub>4</sub> (top panel) and 1 mg/mL HAuCl<sub>4</sub> (bottom panel), respectively.

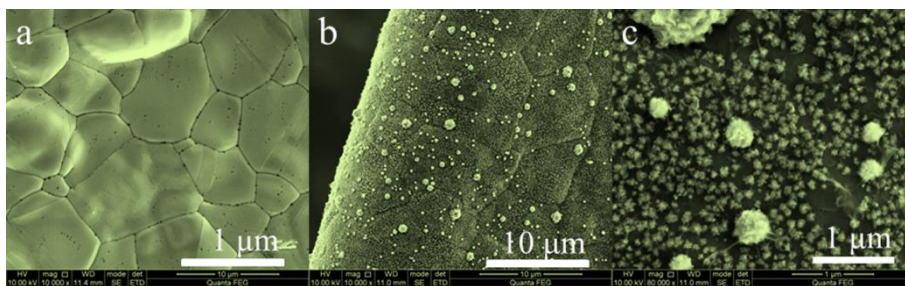

**Figure S3.** (a) SEM images of naked nickel foam surface. (b) Low-magnification and (c) high-magnification SEM images of Au aggregates on the surface of nickel foam.

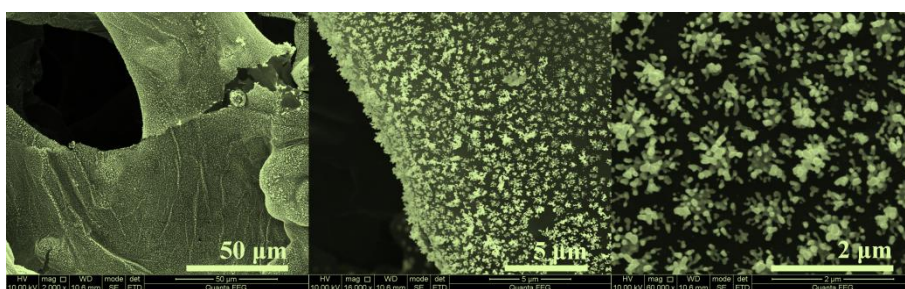

**Figure S4.** SEM images of irregular gold dendrites from low to high magnification.

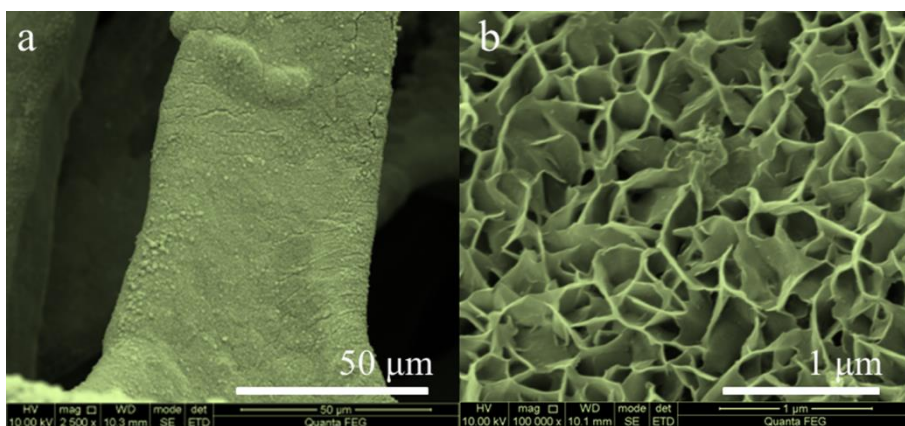

**Figure S5.** SEM image of 3DG@CS@AuNWs from low to high magnification after tenth recycle.

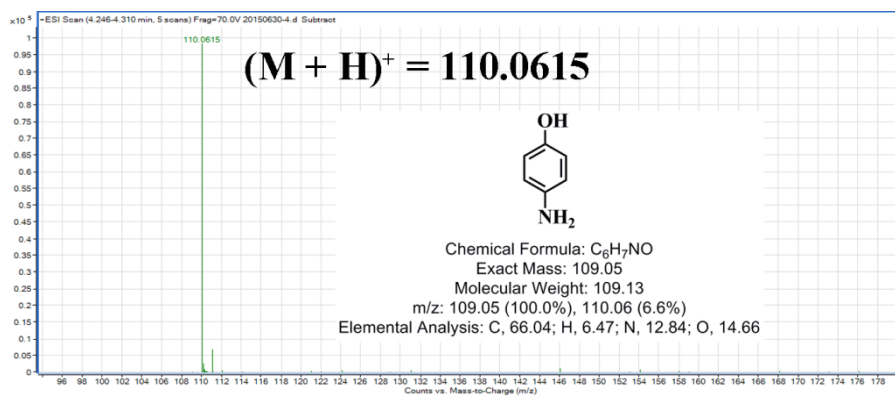

**Figure S6.** Mass spectra of 4-AP measured by Agilent Technologies 6520 series Accurate Mass Quadrupole Time-of-Flight (HPLC-Q-TOF). Inset is the chemical analysis from ChemBioDraw software.

**Table S1.** Comparison of the catalytic performances of 3DG@CS@AuNWs, 3DG@Au, nickel foam@Au, 3DG, nickel foam, and without catalyst for the reduction of 4-NP under identical conditions. And other reported catalysts are also listed for comparison.

| Entry | Catalysts                                      | $K_{app}$ (S <sup>-1</sup> ) | Ref.      |
|-------|------------------------------------------------|------------------------------|-----------|
| 1     | Without catalyst                               | $4.31 \times 10^{-5}$        | This work |
| 2     | Nickel foam                                    | $2.33 \times 10^{-4}$        | This work |
| 3     | 3DG                                            | $6.97 \times 10^{-5}$        | This work |
| 4     | NF@Au                                          | $2.18 \times 10^{-4}$        | This work |
| 5     | 3DG@Au                                         | $6.1 \times 10^{-3}$         | This work |
| 6     | 3DG@CS@Au                                      | $1.23 \times 10^{-2}$        | This work |
| 7     | POMs@Ag                                        | $6.65 \times 10^{-2}$        | 1         |
| 8     | Au NPs/chitosan                                | $5.61 \times 10^{-2}$        | 2         |
| 9     | Au NPs/chitosan/Fe <sub>3</sub> O <sub>4</sub> | $4.71 \times 10^{-2}$        | 2         |
| 10    | AuNPs@CSNFs                                    | $5.9 \times 10^{-3}$         | 3         |
| 11    | Ag-M45                                         | $5.23 \times 10^{-3}$        | 4         |
| 12    | Ag@Me <sub>10</sub> CB[5]                      | $1.31 \times 10^{-3}$        | 5         |
| 13    | Ag/MFC                                         | $1.71 \times 10^{-2}$        | 6         |
| 14    | Pt–Au pNDs/RGOs                                | $3.8 \times 10^{-3}$         | 7         |
| 15    | Pt black                                       | $0.7 \times 10^{-3}$         | 7         |
| 16    | Au NCs                                         | $0.3 \times 10^{-3}$         | 7         |
| 17    | Au@Ag nanorods                                 | $4.57 \times 10^{-3}$        | 8         |
| 18    | Pt–Au ANCs                                     | $1.33 \times 10^{-3}$        | 9         |
| 19    | Cat <sub>3</sub> Au <sub>1</sub>               | $2.46 \times 10^{-4}$        | 10        |
| 20    | Cu/Ag NPs                                      | $3.95 \times 10^{-3}$        | 11        |
| 21    | Cu/Ag NPs                                      | $1.5 \times 10^{-3}$         | 12        |

## References.

1. G.-G. Gao, C.-Y. Song, X.-M. Zong, D.-F. Chai, H. Liu, Y.-L. Zou, J.-X. Liu and Y.-F. Qiu, *CrystEngComm*, 2014, **16**, 5150-5158.
2. Y. Qiu, Z. Ma and P. Hu, *J. Mater. Chem. A*, 2014, **2**, 13471-13478.
3. H. Koga, E. Tokunaga, M. Hidaka, Y. Umemura, T. Saito, A. Isogai and T. Kitaoka, *Chem. Commun.*, 2010, **46**, 8567-8569.
4. B. Duan, F. Liu, M. He and L. Zhang, *Green Chemistry*, 2014, **16**, 2835-2845.
5. H.-F. Li, J. Lü, J.-X. Lin and R. Cao, *Inorg. Chem.*, 2014, **53**, 5692-5697.
6. M. Zhu, C. Wang, D. Meng and G. Diao, *J. Mater. Chem. A*, 2013, **1**, 2118-2125.

7. J.-J. Lv, A.-J. Wang, X. Ma, R.-Y. Xiang, J.-R. Chen and J.-J. Feng, *J.Mater. Chem. A*, 2015, **3**, 290-296.
8. X. Guo, Q. Zhang, Y. Sun, Q. Zhao and J. Yang, *ACS Nano*, 2012, **6**, 1165-1175.
9. G. Fu, L. Ding, Y. Chen, J. Lin, Y. Tang and T. Lu, *CrystEngComm*, 2014, **16**, 1606-1610.
10. M. Raula, D. Maity, M. H. Rashid and T. K. Mandal, *J. Mater. Chem.*, 2012, **22**, 18335-18344.
11. W. Wu, M. Lei, S. Yang, L. Zhou, L. Liu, X. Xiao, C. Jiang and V. A. L. Roy, *J. Mater.Chem. A*, 2015, **3**, 3450-3455.
12. Y. Mei, Y. Lu, F. Polzer, M. Ballauff and M. Drechsler, *Chem. Mater.*, 2007, **19**, 1062-1069.
